# Supplementary material for: Exploratory approach to speculate on body composition models for elite teenage basketball players
Source: Springer Nature journal article supplement (doi:10.1038/s41598-025-20293-2), 2025-10-17
Supplement: MOESM1 [file 41598_2025_20293_MOESM1_ESM.docx]

| **Table S1**. Re-test on 13 basketball players | | |
| --- | --- | --- |
| Variable | Mean | SD |
| age [years] | 16.91 | 1.01 |
| BM [kg] | 82.99 | 12.22 |
| stature [cm] | 191.28 | 7.94 |
| arm [cm] | 29.87 | 2.95 |
| thigh [cm] | 54.27 | 4.28 |
| calf [cm] | 38.72 | 2.00 |
| triceps sk [mm] | 7.35 | 3.00 |
| biceps sk [mm] | 5.27 | 1.79 |
| subscapular sk [mm] | 8.58 | 2.00 |
| suprailiac sk [mm] | 9.46 | 3.28 |
| sopra spinal sk [mm] | 7.42 | 2.67 |
| thigh sk [mm] | 10.85 | 3.21 |
| calf sk [mm] | 7.00 | 2.17 |
| sk sum [mm] | 55.92 | 16.12 |
| R [Ω] | 415.48 | 41.52 |
| Xc [Ω] | 51.68 | 3.83 |
| TBW [kg] | 54.68 | 6.57 |
| ECW [kg] | 22.22 | 2.37 |
| ICW/ECW | 1.46 | 0.05 |
| BV [L] | 76.96 | 11.9 |
| d [kg/L] | 1.078 | 0.01 |
| BF_Brozek [%] | 7.94 | 5.08 |
| BF_2-C Siri [%] | 7.47 | 5.38 |
| BF_Lohman [%] | 7.03 | 5.39 |
| BF_3-C Siri [%] | 8.22 | 4.29 |
| BF_Mauro_II [%] | 9.53 | 4.71 |
| note: SD, standard deviation; BM, body mass; sk, skinfold thickness; R, resistance; Xc, capacitive reactance; TBW, total body water; ECW, extracellular water; BV, body volume; d, body density; BF, body fat | | |
